# Supplementary material
Source: bioRxiv or medRxiv preprint supplement (https://www.biorxiv.org/highwire/filestream/120195/field_highwire_adjunct_files/4/325399-13.pdf)
Supplement: Supplementary file [file 325399-13.pdf]

## Supplemental Information

**Table S1: Dose response conditions**

| <b>Toxin</b>    | <b>Class</b>        | <b>Doses Tested (<math>\mu\text{M}</math>)</b> | <b>Mapping Concentration (<math>\mu\text{M}</math>)</b> | <b>Diluent</b> |
|-----------------|---------------------|------------------------------------------------|---------------------------------------------------------|----------------|
| Cadmium         | Heavy Metal         | 100, 200, 300, 400                             | 100                                                     | Water          |
| Carmustine      | Chemotherapeutic    | 125, 250, 500, 1000                            | 250                                                     | DMSO           |
| Chlorothalonil  | Pesticide           | 125, 250, 500, 1000                            | 250                                                     | DMSO           |
| Chlorpyrifos    | Pesticide           | 0.25, 0.5, 1, 2                                | 1                                                       | DMSO           |
| Cisplatin       | Chemotherapeutic    | 125, 250, 500, 1000                            | 250                                                     | Water          |
| Copper          | Heavy Metal         | 625, 125, 250, 500                             | 250                                                     | Water          |
| Diquat          | Pesticide           | 250, 500, 1000, 2000                           | 250                                                     | Water          |
| Fluoxetine      | Neuropharmaceutical | 625, 125, 250, 500                             | 250                                                     | DMSO           |
| FUdR            | Chemotherapeutic    | 375, 50, 75, 100                               | 50                                                      | Water          |
| Irinotecan      | Chemotherapeutic    | 625, 125, 250, 500                             | 125                                                     | DMSO           |
| Mechlorethamine | Chemotherapeutic    | 200, 300, 400, 500                             | 200                                                     | DMSO           |
| Paraquat        | Pesticide           | 500, 1000, 2000, 4000                          | 500                                                     | Water          |
| Silver          | Heavy Metal         | 75, 150, 300, 500                              | 150                                                     | Water          |
| Topotecan       | Chemotherapeutic    | 50, 100, 200, 400                              | 400                                                     | Water          |
| Tunicamycin     | Chemotherapeutic    | 5, 10, 15, 20                                  | 10                                                      | DMSO           |
| Vincristine     | Chemotherapeutic    | 20, 40, 60, 80                                 | 80                                                      | Water          |

**Table S2: Principal components that explain 90% of phenotypic variation per toxin**

| <b>Toxin</b>    | <b>Number of Principal Components</b> | <b>Cumulative Variance Explained</b> |
|-----------------|---------------------------------------|--------------------------------------|
| Cadmium         | 6                                     | 90.93%                               |
| Carmustine      | 6                                     | 90.26%                               |
| Chlorothalonil  | 6                                     | 91.98%                               |
| Chlorpyrifos    | 7                                     | 91.60%                               |
| Cisplatin       | 6                                     | 90.75%                               |
| Copper          | 8                                     | 91.64%                               |
| Diquat          | 6                                     | 90.95%                               |
| Fluoxetine      | 7                                     | 90.09%                               |
| FUdR            | 7                                     | 91.47%                               |
| Irinotecan      | 5                                     | 92.78%                               |
| Mechlorethamine | 7                                     | 91.93%                               |
| Paraquat        | 5                                     | 90.50%                               |
| Silver          | 5                                     | 92.41%                               |
| Topotecan       | 5                                     | 90.39%                               |
| Tunicamycin     | 5                                     | 93.28%                               |
| Vincristine     | 6                                     | 92.60%                               |

**Table S3: Power calculations**

| <b>Number of replicates</b> | <b>Phenotypic variance explained (%) detectable with 80% power</b> |
|-----------------------------|--------------------------------------------------------------------|
| 23                          | 38                                                                 |
| 46                          | 21.9                                                               |
| 69                          | 15.3                                                               |
| 92                          | 11.7                                                               |
| 115                         | 9.5                                                                |
| 138                         | 8                                                                  |

**Table S4: List of PCs mapped to each hotspot with NIL-assay tested toxins in bold**

| IV Left               |            |              | IV Right              |            |              | V                     |            |              |
|-----------------------|------------|--------------|-----------------------|------------|--------------|-----------------------|------------|--------------|
| Toxin                 | Trait      | %VE          | Toxin                 | Trait      | %VE          | Toxin                 | Trait      | %VE          |
| <b>Carmustine</b>     | <b>PC6</b> | <b>5.60</b>  | <b>Chlorothalonil</b> | <b>PC3</b> | <b>10.88</b> | <b>Carmustine</b>     | <b>PC1</b> | <b>7.00</b>  |
| <b>Chlorothalonil</b> | <b>PC2</b> | <b>4.31</b>  | Chlorpyrifos          | PC2        | 7.74         | <b>Chlorothalonil</b> | <b>PC1</b> | <b>15.35</b> |
| <b>Chlorothalonil</b> | <b>PC3</b> | <b>12.90</b> | Cisplatin             | PC3        | 2.68         | <b>Cisplatin</b>      | <b>PC1</b> | <b>10.25</b> |
| Chlorpyrifos          | PC1        | 6.34         | <b>Fluoxetine</b>     | <b>PC1</b> | <b>10.73</b> | <b>Cisplatin</b>      | <b>PC4</b> | <b>7.18</b>  |
| <b>Cisplatin</b>      | <b>PC1</b> | <b>6.05</b>  | <b>Fluoxetine</b>     | <b>PC5</b> | <b>7.92</b>  | Irinotecan            | PC2        | 6.78         |
| <b>Cisplatin</b>      | <b>PC3</b> | <b>4.78</b>  | FUdR                  | PC3        | 5.54         | Irinotecan            | PC5        | 6.43         |
| Copper                | PC2        | 4.85         | <b>Irinotecan</b>     | <b>PC2</b> | <b>5.49</b>  | Mechlorethamine       | PC2        | 8.67         |
| Copper                | PC6        | 5.86         | Vincristine           | PC6        | 6.75         | <b>Paraquat</b>       | <b>PC1</b> | <b>9.98</b>  |
| Fluoxetine            | PC1        | 6.65         |                       |            |              | <b>Silver</b>         | <b>PC1</b> | <b>17.81</b> |
| FUdR                  | PC3        | 5.54         |                       |            |              |                       |            |              |
| <b>Silver</b>         | <b>PC3</b> | <b>9.76</b>  |                       |            |              |                       |            |              |
| <b>Silver</b>         | <b>PC4</b> | <b>9.28</b>  |                       |            |              |                       |            |              |
| <b>Silver</b>         | <b>PC5</b> | <b>11.70</b> |                       |            |              |                       |            |              |
| Topotecan             | PC2        | 9.70         |                       |            |              |                       |            |              |
| <b>Tunicamycin</b>    | <b>PC1</b> | <b>15.90</b> |                       |            |              |                       |            |              |
| <b>Tunicamycin</b>    | <b>PC3</b> | <b>6.70</b>  |                       |            |              |                       |            |              |
| Vincristine           | PC5        | 6.47         |                       |            |              |                       |            |              |
| Vincristine           | PC6        | 6.75         |                       |            |              |                       |            |              |

**Reagents used to generate NILs and CSSs**

Chromosome IVL NILs:

**ECA229[*eanIR149*(IV:3,684,741-9,045,991, N2>CB4856)]**

starting RIAL: QX275

**ECA231[*eanIR151*(IV:4,475,146-9,334,865, CB4856>N2)]**

starting RIAL: QX591

Left indel primers (IV: 5,110,734)

oECA781: GAGCACTTTGGCGACTTTTCG

oECA782: TCCGGGCAAATTAGTGTGGC

Right indel primers (IV: 8,212,089)

oECA857: CCACACGTCTACGCTTTGGA

oECA858: AATCGTGGCATTGGTGGACA

Chromosome IVR NILs:

**ECA240[*eanIR160*(IV:12,865,211-17,493,829, CB4856>N2)]**

starting RIAL: QX349

**ECA241[*eanIR161*(IV:13,016,066-17,493,829, N2>CB4856)]**

starting RIAL: QX375

Left indel primers (IV: 13,207,120)

oECA904: AACAGATACTCGCCGTTGCT

oECA905: ATTTGTACCACGCGTGACCT

Right indel primers (IV: 17,356,993)

oECA910: GACAACGCCCACTACGACAA

oECA911: ACCCAACCAGTTGAGCACAT

Chromosome V NILs:

**ECA230[*eanIR150*(V:7,082,839-13,839,858, N2>CB4856)]**

starting RIAL: QX131

**ECA232[*eanIR152*(V:7,667,158-13,678,801, CB4856>N2)]**

starting RIAL: QX450

Left indel primers (V: 7,862,556)

oECA799: TTCTCGCTACTGGAACACGC

oECA800: TCAAGAAGCGTTGGGAAGTCT

Right indel primers (V: 13,110,045)

oECA745: TGCAGAGGTGGAGTAACCCT

oECA746: CTCGGTCTCTCCCCACTAA

Chromosome V CSSs:

**ECA554[*eanIR321*(V:1-20,924,180, N2>CB4856)]**

**ECA573[*eanIR322*(V:1-20,923,490, CB4856>N2)]**

Left indel primers (V: 144,547)

oECA1141: CTCATGGGAGTAACCTGGGC

oECA1142: CGGTGACAACGGAGAATCCA

Right indel primers (V: 20,622,851)

oECA1147: GTTTAGTACCAGCGGGGCAT

oECA1148: TGCATTCCGACCCAAGAGAC

Background genotype confirmation primers for Chromosome V CSSs:

(I: 7,802,675)

oECA835: GTGGGTGGGAAGAAGCCTTT

oECA836: GCGTTGTGCAACCCAAAATG

(I: 14,736,165)

oECA631: GCTCAGCTCTTCACTTCCCA

oECA638: GTGCAATTGCGCAGGTAAGG

(II: 6,765,211)

oECA609: TTTCACACAAACCATGCGCT

oECA610: ACTCGTCTGCTGGGTATTCT

(II: 12,106,984)

oECA644: GGTCTGTCCAGTGTCCAGAA

oECA651: TCTGACAAGCGGCTTTCAGT

(III: 9,593,415)

oECA656: TGGCTGGGCATGGCTTAAA

oECA662: CGGGGTACTACACTATGGGG

(III: 6,040,736)

oECA655: GTTTGCATACACCAATGGCGA

oECA661: TGGAAGACGTGCTGAGATGG

(IV: 8,501,135)

oECA859: CTCGCTAATGGGTGAGCGAT

oECA860: TCCTGGAATCAACAACAGCA

(IV: 1,039,851)

oECA1132: ACAGGCGTTCAAAGACACCA

oECA1133: TGTCGAACAAGTGCCACAGT

(IV: 17,317,014)

oECA1135: TTTCAGACAGGAAAGCGCCT

oECA1136: GTTGAGAGATCCGGACCGAC

(V: 144,547)

oECA1141: CTCATGGGAGTAACCTGGGC

oECA1142: CGGTGACAACGGAGAATCCA

(V: 11,940,588)

oECA741: CCAGAATTTAGCATGCGTGGG

oECA742: AGTGTCTGGTTCCGTTAGTACT

(V: 20,622,851)

oECA1147: GTTTAGTACCAGCGGGGCAT

oECA1148: TGCATTCCGACCCAAGAGAC
